# Supplementary material
Source: PubMed Central journal article supplement (PMC3509229)
Supplement: NIHMS414300-supplement-1.pdf [file NIHMS414300-supplement-1.pdf]

Title: Developmental pathways to amygdala-prefrontal function and internalizing symptoms in adolescence

Authors: Cory A. Burghy, Diane E. Stodola, Paula L. Ruttle, Erin K. Molloy, Jeffrey M. Armstrong, Jonathan A. Oler, Michelle E. Fox, Andrea S. Hayes, Ned H. Kalin, Marilyn J. Essex, Richard J. Davidson, and Rasmus M. Birn

Supplementary Table 1.

Summary of Pearson-*r* Statistics for Childhood Cortisol and Adolescent fcMRI Estimates between the Average Left Amygdala ROI and Ventromedial PFC Cluster as Predicted by Early Life Stress Components.

| Average Values of Predictors       | Childhood Cortisol |                 |                   | Adolescent Estimates of Amygdala-vmPFC fcMRI |                 |                 |
|------------------------------------|--------------------|-----------------|-------------------|----------------------------------------------|-----------------|-----------------|
|                                    | Females            | Males           | Total             | Females                                      | Males           | Total           |
|                                    | <i>r</i> -value    | <i>r</i> -value | <i>r</i> -value   | <i>r</i> -value                              | <i>r</i> -value | <i>r</i> -value |
| <u>Early Life Stress Composite</u> |                    |                 |                   |                                              |                 |                 |
| Maternal Depression                | 0.32               | -0.12           | 0.11              | -0.25                                        | 0.04            | -0.13           |
| Parenting Stress                   | 0.33               | 0.26            | 0.31*             | -0.15                                        | -0.01           | -0.10           |
| Marital Conflict                   | 0.22               | 0.03            | 0.20              | -0.21                                        | -0.10           | -0.21           |
| Role Overload                      | 0.30               | -0.03           | 0.20              | -0.17                                        | 0.14            | -0.09           |
| Financial Stress                   | 0.33               | 0.19            | 0.23 <sup>t</sup> | -0.39*                                       | 0.09            | -0.17           |

Note: *n* = 57 (28 female). \**p* < .05 Stress composite includes: maternal depression, parenting stress, marital conflict, role overload, and financial stress.
